1 **Recovered and dead outcome patients caused by influenza A (H7N9)**  
2 **virus infection show different pro-inflammatory cytokine dynamics**  
3 **during disease progress and its application in real-time prognosis**

4 Yingxia Liu<sup>1#\*</sup>, Xinfu Wang<sup>1#</sup>, Houshun Zhu<sup>2,3#</sup>, Jinmin Ma<sup>2,3</sup>, Zhe Lu<sup>4,5</sup>, Jing Yuan<sup>1</sup>,  
5 Jianming Li<sup>1</sup>, Jiandong Li<sup>2,3</sup>, Yan Ren<sup>2,3</sup>, Bo Wen<sup>2,3</sup>, Wenjie Ouyang<sup>2,3</sup>, Haixia Zheng<sup>1</sup>,  
6 Rongrong Zou<sup>1</sup>, Yuhai Bi<sup>1,6</sup>, Changcheng Yin<sup>7</sup>, Zhenyu Guo<sup>2,3</sup>, Wanying Sun<sup>4,5</sup>, Na  
7 pei<sup>2,3</sup>, Junhua Li<sup>2,3</sup>, Shida Zhu<sup>2,3</sup>, Huanming Yang<sup>2,9</sup>, Lei Liu<sup>1</sup>, Xun Xu<sup>2,3</sup>, Siqu Liu<sup>2\*</sup>,  
8 Hui Wang<sup>1,2,8\*</sup>, Liqiang Li<sup>2,3\*</sup>

9 1. Shenzhen Key Laboratory of Pathogen and Immunity, State Key Discipline of Infectious  
10 Disease, Shenzhen Third People's Hospital, Shenzhen 518112, China; 2. BGI-Shenzhen,  
11 Shenzhen 518083, China; 3. China National Genebank, BGI-Shenzhen, Shenzhen 518083,  
12 Guangdong, China; 4. BGI Education Center, University of Chinese Academy of Sciences,  
13 Shenzhen 518083, Guangdong, China; 5. Qingdao University BGI Joint Innovation College,  
14 Qingdao University, Qingdao 266071, China; 6. CAS Key Laboratory of Pathogenic  
15 Microbiology and Immunology, Collaborative Innovation Center for Diagnosis and Treatment  
16 of Infectious Disease, Institute of Microbiology, Center for Influenza Research and Early-  
17 warning (CASCIRE), Chinese Academy of Sciences, Beijing 100101, China; 7. Beijing Protein  
18 Innovation Co. Ltd, Beijing, China; 8. Department of Engineering Science, University of  
19 Oxford, Oxford OX3 7DQ, UK; 9. James D. Watson Institute of Genome Science, Hangzhou,  
20 China.

21 # These authors contributed equally to this work.

22 \* Correspondence and requests for materials should be addressed to Liqiang Li  
23 ([liliqiang@genomics.cn](mailto:liliqiang@genomics.cn)), Yingxia Liu ([yingxialiu@hotmail.com](mailto:yingxialiu@hotmail.com)), Hui Wang  
24 ([wanghui1@genomics.cn](mailto:wanghui1@genomics.cn)), or Siqu Liu: [siquiliu@genomics.cn](mailto:siquiliu@genomics.cn).

## 25 **Abstract**

26 The persistent circulation of influenza A(H7N9) virus within poultry markets and  
27 human society leads to sporadic epidemics of influenza infections. Severe pneumonia  
28 and acute respiratory distress syndrome (ARDS) caused by the virus lead to high  
29 morbidity and mortality rates in patients. Hyper induction of pro-inflammatory  
30 cytokines, which is known as “cytokine storm”, is closely related to the process of viral  
31 infection. However, systemic analyses of H7N9 induced cytokine storm and its  
32 relationship with disease progress need further illuminated. In our study we collected  
33 75 samples from 24 clinically confirmed H7N9-infected patients at different time points  
34 after hospitalization. Those samples were divided into three groups, which were mild,  
35 severe and fatal groups, according to disease severity and final outcome. Human  
36 cytokine antibody array was performed to demonstrate the dynamic profile of 80  
37 cytokines and chemokines. By comparison among different prognosis groups and time  
38 series, we provide a more comprehensive insight into the hypercytokinemia caused by  
39 H7N9 influenza virus infection. Different dynamic changes of cytokines/chemokines  
40 were observed in H7N9 infected patients with different severity. Further, 33 cytokines  
41 or chemokines were found to be correlated with disease development and 11 of them

42 were identified as potential therapeutic targets. Immuno-modulate the cytokine levels  
43 of IL-8, IL-10, BLC, MIP-3a, MCP-1, HGF, OPG, OPN, ENA-78, MDC and TGF- $\beta$  3  
44 are supposed to be beneficial in curing H7N9 infected patients. Apart from the  
45 identification of 35 independent predictors for H7N9 prognosis, we further established  
46 a real-time prediction model with multi-cytokine factors for the first time based on  
47 maximal relevance minimal redundancy method, and this model was proved to be  
48 powerful in predicting whether the H7N9 infection was severe or fatal. It exhibited  
49 promising application in prognosing the outcome of a H7N9 infected patients and thus  
50 help doctors take effective treatment strategies accordingly.

51

## 52 **Introduction**

53 Since the first case of human H7N9 influenza virus infection reported in March,  
54 2013 in China, the number increased to about 1564 at the end of Oct, 2017 according  
55 to WHO [1]. With a high mortality rate at approximately of 40%, H7N9 virus poses  
56 great threat to public health of human beings [2]. Most of the H7N9 influenza virus  
57 infected people suffered from severe pneumonia and acute respiratory distress  
58 syndrome, and around 63% patients were admitted to an intensive care unit (ICU),  
59 about 62% patients had undergone mechanical ventilation [3].

60 H7N9 influenza virus was better adapted to infect and replicate in human upper  
61 and lower airway tissues compared with many other AIVs which was revealed by in

62 vitro studies [4, 5]. It was reported that H7N9 virus could infect higher percentage of  
63 human peripheral blood mononuclear cells (PBMCs) than avian influenza A H5N1  
64 virus and pandemic H1N1 virus do [6]. The avian influenza H7N9 virus can even infect  
65 BALB/C mice without prior adaption and lead to sever pneumonia which was similar  
66 with that in clinical cases [7]. Respiratory epithelia and other types of cells such as  
67 alveolar macrophages could be infected by H7N9 virus and die from apoptosis or  
68 necrosis followed by induction and release of pro-inflammatory cytokines [8]. Hyper-  
69 induction of pro-inflammatory cytokines were well documented in severe H7N9  
70 infected cases and the so called “cytokine storm” showed significant influence on the  
71 final outcome of infections [9].

72 To illuminate the relationship between hyper-induction of cytokines/chemokines  
73 and the progression of H7N9 infection, persistent efforts were made. One study found  
74 the serum levels of interleukin 8 (IL-8), interferon gamma-induced protein 10 (IP-10),  
75 interferon (IFN)- $\alpha$  , IFN- $\gamma$ , macrophage inflammatory protein 1 alpha (MIP-1 $\alpha$ ), MIP-  
76 1 $\beta$ , monocyte chemotactic protein 1 (MCP-1), and monokine induced by gamma  
77 interferon (MIG) were significantly higher in H7N9 virus infected people compared  
78 with healthy controls [10]. Another study suggested blood monitoring of IL-8 and IL-6  
79 may helpful in making effective management of severe H7N9 infection cases as the two  
80 cytokines were found extremely elevated in patients who died from the infection  
81 compared with the discharged counterparts [11]. In a study about 5 hospitalized patients  
82 confirmed with H7N9 virus infection, researchers detected high concentration of IP-10,  
83 MCP-1, MIG, MIP-1 $\alpha/\beta$ , IL-1 $\beta$  and IL-8 in both sera and broncho-alveolar fluid (BALF)

84 samples. What's more, they found a positive correlation between high levels of pro-  
85 inflammatory cytokines and the severity of clinical outcomes [12].

86 Here in our study, we systemically investigated the profile of 80 pro-inflammatory  
87 cytokines/chemokines in H7N9 virus infected patients at different time points. By  
88 grouping patients according to disease severity, we acquired 8 cytokines/chemokines  
89 closely related to outcome prediction. Through algorithm based on maximal relevance  
90 minimal redundancy method, we established a real-time prediction model to prognose  
91 the outcome of H7N9 infected patients. Hopefully the model could be used to assistant  
92 in clinical diagnosis and as guidelines for adopting immunomodulatory therapies.

## 93 **Results**

### 94 **Distinguishable cytokine change pattern in clinically confirmed H7N9 infected** 95 **patients with different severity**

96 Compared with healthy controls, there were 32 cytokines elevated in mild infection  
97 group, 39 cytokines elevated in severe infection group, and 35 cytokines elevated in  
98 fatal infection group with statistical significance (**Figure 1, Figure 2a**). In total, there  
99 were up to 47 of 80 tested cytokines highly expressed in H7N9 infected patients, either  
100 mild, severe or fatal patients. Among these 47 cytokines, 24 highly elevated cytokines  
101 (IL-13, IL-1a, IL-8, IL-10, IL-7, IL-6; IFN- $\gamma$ ; CSF2, CSF3; BLC, MIP-1b, MCP-2, IP-10, NAP-2,  
102 GRO; EGF, TGF- $\beta$ 1, PDGF-BB, IGFBP-2, SCF, HGF, ANG; TNF-a) were shared by all patient  
103 groups (**Figure 2a**). While 7 cytokines (IL-12, p70, PARC, TIMP-2, GRO-a, IL-2, TARC,

104 TNF- $\beta$ ) were specifically elevated in severe infection group, 4 cytokines (MIP-1d, MIF,  
105 Leptin, IGFBP-1) were exclusively elevated in fatal cases and 1 cytokine (ENA-78) was  
106 only detected to be induced in mild infection patients (**Figure 2a**). The results indicated  
107 hyper-cytokemia was induced in patients infected by H7N9 virus and cytokine profile  
108 could be different in H7N9 infected people according to severity of the disease.

109 In contrast to the generally belief that cytokines would be greatly up-regulated  
110 during the hyper-cytokemia caused by H7N9 infections [13], we found several  
111 cytokines down-regulated in H7N9-infected patients compared with controls. To be  
112 specific, IGFBP-3 and LIF were down-regulated in mild group, IGFBP-3 was down-  
113 regulated in severe group, while LIF and NT-3 were down-regulated in fatal group  
114 (**Figure 2b**).

#### 115 **Fatal group showing more intense hypercytokemia than the mild and severe** 116 **patient groups**

117 There were 12 and 15 cytokines up-regulated for more than 2 folds in mild and  
118 severe groups compared with healthy controls respectively, while amount to 26  
119 cytokines showed more than 2-fold induction in the fatal group. It was notable that five  
120 cytokines were changed even more than 10 folds in the fatal group which were 67.21  
121 folds for HGF, 18.44 folds for MCP-2, 16.26 folds for IP-10, 13.42 folds for OPN, and  
122 10.22 folds for Leptin (**Figure 1b**, and **Supplementary Figure 4**).

123 Compared with mild group, only IGFBP-1 was highly elevated in severe group

124 which indicated that mild and severe outcome patients showed a similar  
125 hypercytokinemia pattern. In contrast, fatal patient group showed more cytokines were  
126 dysregulated compared with non-fatal groups at different time points. Compared with  
127 mild and severe groups, 9 cytokines, which were IL-8, IL-10, BLC, MIP-3a, MCP-1,  
128 HGF, IGFBP-1, OPG, and OPN, were significantly elevated in fatal group ( $P < 0.05$ ,  
129 **Figure 2c**). What's more, the 9 cytokines kept at high levels through-out the whole  
130 course of viral infection (**Figure 3a**). Additionally, there were three cytokines, MDC,  
131 ENA-78 and TGF- $\beta$ 3 were significantly down-regulated in the fatal group compared  
132 with the other two infection groups (**Figure 2d**), and ENA-78 as well as MDC and  
133 TGF- $\beta$ 3 showed a persistent trend at lower levels at different time points (**Figure 3b**).  
134 The three down-regulated cytokines may play key roles through-out the course of H7N9  
135 infections (See below analysis).

### 136 **Various cytokines correlated to clinical manifestation of H7N9 infection disease** 137 **but dysregulated in fatal group patients**

138 To reveal the relation between cytokine regulation and manifestations of patients  
139 after H7N9 viral infection, and to explain the contributions of the dysregulated  
140 cytokines to hypercytokinemia syndrome, a serial of correlation analyses was  
141 performed. Based on spearman's rank correlation analysis, 42 cytokines were found  
142 correlated with at least one of the following clinical manifestations which were C-  
143 reactive protein (CRP), oxygenation index (OI), procalcitonin (PCT), and body  
144 temperature (T). Among the 42 cytokines, 21 of them showed negative correlation with

145 CRP and/or PCT and/or T, and/or showed positive correlation with OI values (**Figure**  
146 **4**). Elevation of the 21 cytokines were supposed to be beneficial for the prognosis.  
147 Similarly, we identified 14 cytokines whose elevation were related to more severe  
148 symptoms, which are positively correlated with CRP or/and PCT or/and body  
149 temperature, or/and negatively correlated with OI values (**Figure 4**).

150 Surprisingly, in fatal patients, we found all 9 specific highly elevated cytokines  
151 except IGFBP-1, are harmful, and 3 cytokines, specific down-regulated in fatal patient,  
152 were beneficial when elevated. In the fatal group patients, MDC (0.63 and 0.70 fold to  
153 that of mild and severe patient groups respectively), ENA-78 (0.39 and 0.47) and TGF-  
154  $\beta$ 3 (0.68 and 0.70) were expressed at lower level (**Figure 1b** and **Supplemental Figure**  
155 **3b**). Especially the MDC and ENA-78 were kept at lower level during whole  
156 hospitalization (**Figure 3b**). These results suggested that the expression of MDC, ENA-  
157 78, TGF- $\beta$ 3 had been suppressed or those related pathways may not being activated  
158 efficiently. Besides, 6 elevating-beneficial cytokines, CCL24, TARC, GDNF, PARC,  
159 BDNF and NAP-2 were deficiently responded in fatal group compared with mild or  
160 severe group while the 4 elevating-harmful cytokines, IGFBP-2, IL-6, IP-10, Leptin  
161 and TIMP-1 were elevated in fatal group patients compare with mild or severe groups  
162 ones (**Figure 4** and **Supplementary Figure 4**). These results indicated a distinct pro-  
163 inflammatory cytokine induction profile in fatal H7N9 infected patients comparing with  
164 mild and severe counterparts, and that mounting 21 cytokines, were abnormal and doing  
165 harm, as mediators, to fatal group patients (**Figure 1b** and **4**; **Supplemental Figure 4**).  
166 In contrast, these cytokines were at moderated levels in all mild and recovery patients,



167 which is supposed to be under control of host immune system. Furthermore, it is  
168 reasonable to speculate that drugs or therapies helping for elevating these three  
169 cytokines, especially MDC, ENA-78, TGF- $\beta$ 3, and targeting for decreasing the 8 major  
170 harmful cytokines, would be benefit for survival and recovery in H7N9 infection.

171 **Cytokine co-regulation network during disease progress: dysregulation of**  
172 **cytokines in fatal patients**

173 To analyze the correlation between those cytokines and chemokines during hyper-  
174 cytokinemia, spearman's rank correlation analysis was performed pair by pair, and  
175 cytokine network charts were mapped separately according to the severity of H7N9  
176 viral infection. In those charts, a total of 1372 pairs of cytokines or chemokines were  
177 significantly correlated ( $r > 0.8$  or  $r < -0.8$ ,  $P < 0.05$ ) and line-linked (**Figure 5**). Compared  
178 with healthy and mild samples (**Figure 5a, b**), severe and fatal samples at early time-  
179 points formed networks with cluster centers (**Figure 5c, e**). However, the cluster centers  
180 remain in fatal cases even at late infection stage (**Figure 5f**) while the clusters  
181 disappeared and the correlations between cytokines became weak in severe cases before  
182 discharged from hospital (**Figure 5d**). It was worth noting that cytokine network of  
183 severe cases at early time-point was characterized by single cluster core which may  
184 indicate a more coordinating regulation of inflammation after H7N9 infection in severe  
185 patients compared with that in fatal patients as there showed generally two cluster cores  
186 in their cytokine networks. The lack of cytokine coordination in fatal cases was also  
187 implied by the increased frequencies of negative correlations between cytokines within

188 cluster cores.

### 189 **Real time predicting model establishing based on cytokines profiles**

190 As reported, cytokine levels could be used as predicative indicators of clinical  
191 outcomes in patients identified with H7N9 virus infection [14]. To evaluate the potential  
192 prediction ability of each cytokine, we analyzed the 80 cytokines or chemokines one by  
193 one based on receiver operating characteristic (ROC) curve method. The area values  
194 under the ROC curve (AUC) of each cytokine was represented in a heat map for  
195 predicting illness (Fatal+Severe+Mild groups vs Healthy), Fatality (Fatal group vs  
196 Severe+Mild groups), Mild (Fatal+Severe groups vs Mild group) as well as recovery  
197 (Severe-first vs Severe-last time) (**Figure 6**). 35 cytokines showed values of  $AUC \geq 0.8$ ,  
198 which suggested they could be used for prognosis of H7N9 virus infection with an accuracy  
199 of no less than 80%. BLC was found to be able to predict 94% fatality cases, higher than  
200 all previous reported cytokine biomarkers, which highlight the importance of this cytokine  
201 during H7N9 virus infection for the first time. In addition, MIF (82%), IGFBP1 (82%),  
202 HGF (86%) and IL-8 (89%) were all promising predictors for fatality cases. For mild cases,  
203 IL-10 (83%) as well as IL-8 (82%) turned out to be good predictors while only Flt-3-LG  
204 (84%) showed the potential to predict recovery from severe cases (**Supplementary Figure**  
205 **7**).

206 It is assumed that power of prognosis predicting would be increased using the different  
207 clinical features of multi-cytokines. It is also plausible to test for real time prognosis  
208 assessment using the multi-cytokines model. To construct a multi-cytokine prognosis

209 predication model, the minimum redundancy maximum relevance (mRMR) algorithm was  
210 applied to the first time-point samples of all patients in our dataset, which containing 7  
211 samples of mild patients, 11 samples of severe patients and 6 samples of fatal patients.

212 In case of predicting mild outcomes in people after infection of H7N9 virus, we divided  
213 the data into two groups which was the mild patients group (M) and the severe plus the  
214 fatal patients (S+D) group. Based on mRMR sorting and selection results, it was found a  
215 minimal usage of concentrations of 9 cytokines could distinguish M group from S+D group  
216 with an error rate at 0 (**Figure 6**). The mathematical model was displayed as below and the  
217 prognosis would be mild if the index value was negative:

$$\begin{aligned} 218 \quad \mathbf{M-SD\ index\ value} &= \mathbf{-211.6204 + (0.2094 * IL8 + 0.1978 * IGFBP2 + 0.0376 * Leptin} \\ 219 \quad &+ \mathbf{0.0323 * ENA78 + 0.0136 * IP10 + 0.0020 * TIMP2) - (1.381 * THPO + 0.0808 *} \\ 220 \quad &\mathbf{IL10 + 0.0046 * HGF)} \end{aligned}$$

221 Similarly, to predict the fatal outcomes, we divided the data into mild and severe  
222 (M+S) group and fatal (D) group. Six cytokines were selected and their concentrations  
223 could be used to distinguish D group from M+S group with an error rate at 0.2 (**Figure**  
224 **6**). The formula was displayed as below and positive index values indicated a fatal  
225 outcome.

$$\begin{aligned} 226 \quad \mathbf{MS-D\ Index\ value} &= \mathbf{6.9210 + (0.2686 * BLC + 0.0809 * IL8 + 0.004 * IGFBP1 +} \\ 227 \quad &\mathbf{0.0107 * MIF) - (1.0847 * GDNF + 0.0017 * HGF)}. \end{aligned}$$

228 The two indices efficiently divided the samples of first time point of three symptom

229 groups in a 2-D coordinate, Mild in Quadrant-III (M-SD index $<0$  & MS-D index $<0$ ),  
230 Severe in Quadrant-IV (M-SD index $>0$  & MS-D index $<0$ ) and Fatal in Quadrant-I (MS-  
231 D index  $>0$ ). (Figure 8A). To validate the two indices, later time-point samples and healthy  
232 samples were applied to the two formulas. All healthy and most of the mild samples (10 of  
233 11 samples) were retained in Quadrant-III at different time points (**Figure 7B**).  
234 Interestingly, samples of the severe group cases displayed a noticeable trend of moving  
235 from Quadrant-IV towards the Healthy and Mild section (Quadrant-III), and few time  
236 points of single patient entering the Fatal Quadrant I (only two time points of two patients,  
237 S1 and S8), demonstrating recovery during treatment (**Figure 7C**). The Fatal samples  
238 mainly remained in Quadrant-I, again demonstrating the robustness of the indexes (**Figure**  
239 **7D**). For summarize, we established a two-dimensional coordinate system and a combining  
240 of 13 cytokines could assessment disease status and predict prognosis precisely.

## 241 **Discussion**

242 80 cytokines and chemokines profiles were investigated in patients infected with  
243 H7N9 virus. This was the most comprehensive study as far as we know and gave a  
244 panorama of hypercytokinemia in patients with different severity. It has been reported  
245 that IL-2, IL-6, IL-10, IL-17, IL-18, IFN- $\gamma$ , TNF- $\alpha$ , MIF, SCF, MCP-1, HGF, SCGF- $\beta$   
246 and IP-10 were significantly elevated in H7N9 virus infected patients [14-17]. However,  
247 here we revealed up to 24 cytokines and chemokines were up-regulated remarkably in  
248 infected cases compared with healthy controls during H7N9 viral infection and many  
249 of them were reported for the first time yet showed great induction on protein levels.

250 For example, compared with healthy people, BLC elevated for 2.19, 2.69 and 6.43 folds  
251 in mild, severe and fatal cases on protein levels respectively. Besides, the protein levels  
252 of MCP-2 increased 8.56, 7.92 and 9.44 folds in mild, severe and fatal cases comparing  
253 with basal levels. Both of the inflammatory factors were chemokines with BLC targeted  
254 at B cells while MCP-2 could activate many kinds of immune cells such as master cells,  
255 monocytes, NK cells and T cells [18-20]. Our findings, especially the discovery of  
256 novel cytokines and chemokines that presented remarkable changes in people infected  
257 with H7N9 virus, provided new targets for adopting immuno-modulatory therapies and  
258 gave clues for illuminating mechanisms of hypercytokinemia.

259 Great attention was paid to the highly induced cytokines or chemokines after H7N9  
260 viral infection while few people talked about those downregulated cytokines or  
261 chemokines [21, 22]. In an *in vitro* cell culture model infected with H7N9 virus, nine  
262 cytokines were reported to be down-regulated by 2 folds compared with clean controls  
263 [23]. However, the cytokine responses in cell cultures may not reflex the real scenario  
264 in patients infected with H7N9 virus. Our study of clinical cases showed there were 3  
265 cytokines and chemokines down-regulated significantly and none of them in  
266 accordance with the previous report. For the three cytokines and chemokines, IGFBP-  
267 3 was firstly recognized as bioavailability regulator of insulin-like growth factors (IGFs)  
268 which could regulate the entry of IGFs to tissues [24]. However, later studies showed  
269 IGFBP-3 played more roles. For instance, through binding to different ligands, IGFBP-  
270 3 could induce apoptosis alone or in conjunction with certain agents, or contribute to  
271 the repair of damaged DNA [25]. LIF could prompt the differentiation of myeloid

272 leukemia cells and showed anti-inflammation properties [26, 27]. NT-3, which is a  
273 neurotrophic factor in the nerve growth factor family, was also detected in monocytes  
274 and play roles in immune responses [28]. Based on the properties of the three cytokines  
275 or chemokines, further study may shed light on the underlying mechanism of H7N9-  
276 induced cell death, dysregulation of inflammatory response and impaired antibody  
277 production after H7N9 viral infections [29, 30].

278       It was proved that patients with severe influenza infections were more likely to  
279 have higher temperature and viral load [31], lower CRP levels [32], decreased OI [33],  
280 as well as lower PCT levels [34]. In this study we correlated the cytokine and  
281 chemokine levels with these parameters innovatively and distinguished those pro-  
282 inflammatory factors according to their beneficial or detrimental effects on clinical  
283 outcomes. ENA-78, IP-10, IL-8, TIMP-2, IGFBP-2, Leptin, IL-10, THPO, HGF, BLC,  
284 MIF, IGFBP-1, and GDNF were especially emphasized here as the 13 cytokines and  
285 chemokines showed predictive potential in H7N9 infected cases. Among them, IP-10,  
286 HGF, MIF were found to be independent outcome predictors in H7N9 virus infected  
287 patients previously which was in accordance with our findings [35]. However, we  
288 further explored the possibility of establishing a method that could make real-time  
289 prediction of clinical outcomes after H7N9 infection based on as less as those cytokines  
290 or chemokines. Though there were data showed IL-6 >97 pg/mL, IL-8 >40 pg/mL and  
291 CRP >90 mg/L in serum may indicate adverse clinical outcomes, or studies declared a  
292 significant association between CRP level and fatality outcome, they did not possess  
293 the ability of making real-time prediction in H7N9 infected patients [35-37]. The multi-

294 factor prediction models we established in the study turned out to be powerful and  
295 accurate as revealed by the verification data. It would be hopefully that the formulas  
296 could be applied to help in precise treatment in H7N9 infected patients, through getting  
297 a preliminary judgement on the prognosis of a H7N9 virus infected patient as early as  
298 possible, and clearly that is vital for later following up management.

## 299 **Methods**

### 300 **Patients and sample collection.**

301 The study protocol was approved by the Institutional Review Board of BGI IRB  
302 consent and Peking university Shenzhen hospital IRB. Informed written consent was  
303 obtained from all participants. 18 nonfatal H7N9-infected patients (7 mild patients, 11  
304 severe patients), 6 fatal H7N9-infected patients and 5 healthy controls were enrolled in  
305 the study (**Figure S1a**). All patients with H7N9 infection were confirmed by real-time  
306 PCR and were admitted to the Shenzhen Third People's Hospital. There showed no  
307 statistical difference in terms of age between fatal patients and no-fatal patient  
308 (mean±SD. 50.3±20.1 vs 54.2±16.0). The duration of hospitalization was longer in fatal  
309 group than nonfatal group (mean±SD. 18.6±9.9 vs 36.3±6.9,  $P<0.0001$ ). Most of the  
310 patients were admitted to hospital within 10 days after symptom onset and were given  
311 anti-viral treatment immediate after admission. Other clinical characteristics were  
312 similar between two groups (data not shown).

313 Patients were divided into mild group, severe group and death group according to

314 the guidelines for avian influenza A(H7N9) virus [38]. Blood samples were collected  
315 on the first day of admission and throughout of the process of the disease. There were  
316 5 samples collected within 7 days after admission and 8 samples collected within 7 days  
317 before discharge in mild patient group (mild group). For severe infection (severe group)  
318 and deadly cases (fatal group), 8 and 5 samples were collected within 7 days after  
319 admission, 25 and 13 samples were collected during illness progression stage, 9 and 2  
320 samples were collected either within 7 days before discharge or death, respectively  
321 **(Supplemental Figure 1a).**

#### 322 **Viral RNA extraction and real-time PCR.**

323 RNA was extracted from the samples by QIAamp viral RNA mini kit. Standard  
324 Real-time reverse transcription polymerase chain reaction (RT-PCR) assay for H7N9  
325 confirmation was performed in Shenzhen Center for Disease Control (CDC). The  
326 results of positive or negative were judged according to the Guidelines authorized by  
327 China National Influenza Center of China CDC [38].

#### 328 **Serum Cytokine and chemokine arrays.**

329 EDTA-anticoagulant tubes were used to collect blood samples. Plasma was  
330 separated by centrifugation (3000g for 10 min) at 4°C and stored in -80°C until analysis.  
331 We analyzed 80 cytokines and chemokines (14 interleukins; 1 interferon; 4 tumor  
332 necrosis factors; 3 colony stimulating factors; 26 growth factors; 26 chemokines; 6  
333 other cytokines; Table S2) with the RayBio® Human Cytokine Antibody Array 5(G-



334 Series) according to the manufacturers' instructions.

### 335 **Statistical analysis and co-regulation network constructions.**

336 Wilcoxon signed-rank test was used to determine whether the differences between  
337 two groups were statistical significance. Spearman' s rank correlation coefficient was  
338 adopted to analyze the line correlation. Any value of  $P < 0.05$  was considered  
339 statistically significant. Statistics and plotting were done using libraries implanted in  
340 Rstudio version 1.1.

### 341 **ROC predicting analysis**

342 We calculated the receiver operating characteristics (ROC) curves for outcome  
343 predicting analysis using single cytokine.

### 344 **mRMR predict model establishment**

345 All of the samples were classed into 2 compare group: M vs SD (mild as one group,  
346 severe and death as one group), MS vs D (mild and severe as one group, death as one  
347 group). The minimum redundancy maximum relevance (mRMR) feature selection  
348 method described by Peng *et al* [39] was used to calculate the redundancy coefficient  
349 for each cytokine between group respectively in M vs SD and MS vs D, which was  
350 used to sort the cytokine.

351 The accuracy of each model was evaluated by leave-one-out cross-validation  
352 (LOOCV) to find the optimum subset for building a linear discrimination classifier. We

353 chose the lowest error rate model as the final model to predict the remaining samples  
354 such as healthy control, mild and severe samples in different time points. Two of the  
355 linear regression formula, respectively for 2 compare group, was as follows:

356 
$$f(x) = a_0 + a_1X_1 + a_2X_2 + \dots + a_nX_n$$

357 where “ $X_i$ ” refers the expression of the cytokine selected from mRMR selection and  $a_i$   
358 indicates the redundancy coefficient of each cytokine.

### 359 **Disclosure of potential conflicts of interests**

360 The authors declare no conflict of interest whatsoever.

### 361 **Ethical approval**

362 All procedures performed in the studies involving human participants were  
363 approved in accordance with the ethical standards of the institutional and/or national  
364 research committee and with the 1964 Helsinki declaration and its later amendments or  
365 comparable ethical standards.

### 366 **Acknowledgements**

367 This study was supported by the Shenzhen Science and Technology Research and  
368 Development projects (JCYJ20150402111430617 and JCYJ20160427151920801).

### 369 **References:**

- 370 1. *The fight against bird flu*. Nature, 2013. **496**(7446): p. 397.
- 371 2. Su, S., et al., *Epidemiology, Evolution, and Pathogenesis of H7N9 Influenza Viruses in Five*  
372 *Epidemic Waves since 2013 in China*. Trends Microbiol., 2017. **25**(9): p. 713-728.
- 373 3. Li, Q., et al., *Epidemiology of human infections with avian influenza A(H7N9) virus in China*.  
374 N Engl J Med, 2014. **370**(6): p. 520-32.
- 375 4. Chan, M., et al., *Tropism and innate host responses of a novel avian influenza A H7N9 virus:*  
376 *an analysis of ex-vivo and in-vitro cultures of the human respiratory tract*. Lancet Respir Med,  
377 2013. **1**(7): p. 534-42.
- 378 5. Zeng, H., et al., *A(H7N9) virus results in early induction of proinflammatory cytokine responses*  
379 *in both human lung epithelial and endothelial cells and shows increased human adaptation*  
380 *compared with avian H5N1 virus*. J. Virol., 2015. **89**(8): p. 4655-67.
- 381 6. Lee, A.C., et al., *Avian influenza virus A H7N9 infects multiple mononuclear cell types in*  
382 *peripheral blood and induces dysregulated cytokine responses and apoptosis in infected*  
383 *monocytes*. Journal of General Virology, 2017. **98**(5): p. 922-934.
- 384 7. Li, C., et al., *Avian influenza A H7N9 virus induces severe pneumonia in mice without prior*  
385 *adaptation and responds to a combination of zanamivir and COX-2 inhibitor*. PloS one, 2014.  
386 **9**(9): p. e107966.
- 387 8. Shinya, K., et al., *Integrated clinical, pathologic, virologic, and transcriptomic analysis of*  
388 *H5N1 influenza virus-induced viral pneumonia in the rhesus macaque*. Journal of Virology,  
389 2012. **86**(11): p. 6055-66.
- 390 9. La Gruta, N.L., et al., *A question of self-preservation: immunopathology in influenza virus*  
391 *infection*. Immunology & Cell Biology, 2007. **85**(2): p. 85-92.
- 392 10. Zhou, J., et al., *Biological features of novel avian influenza A (H7N9) virus*. Nature, 2013.  
393 **499**(7459): p. 500-3.
- 394 11. Wang, Z., et al., *Early hypercytokinemia is associated with interferon-induced transmembrane*  
395 *protein-3 dysfunction and predictive of fatal H7N9 infection*. Proceedings of the National  
396 Academy of Sciences of the United States of America, 2014. **111**(2): p. 769-74.
- 397 12. Yang, Z.F., et al., *Clinical, virological and immunological features from patients infected with*  
398 *re-emergent avian-origin human H7N9 influenza disease of varying severity in Guangdong*  
399 *province*. PLoS One, 2015. **10**(2): p. e0117846.
- 400 13. Liu, Q., Y.H. Zhou, and Z.Q. Yang, *The cytokine storm of severe influenza and development of*  
401 *immunomodulatory therapy*. Cell Mol Immunol, 2016. **13**(1): p. 3-10.
- 402 14. Guo, J., et al., *The serum profile of hypercytokinemia factors identified in H7N9-infected*  
403 *patients can predict fatal outcomes*. Scientific reports, 2015. **5**: p. 10942.
- 404 15. Chi, Y., et al., *Cytokine and chemokine levels in patients infected with the novel avian influenza*  
405 *A (H7N9) virus in China*. The Journal of infectious diseases, 2013. **208**(12): p. 1962-1967.
- 406 16. Zhao, C., et al., *Pro-inflammatory cytokine dysregulation is associated with novel avian*  
407 *influenza a (H7N9) virus in primary human macrophages*. Journal of General Virology, 2016.  
408 **97**(2): p. 299-305.
- 409 17. Huang, R., et al., *Profiles of acute cytokine and antibody responses in patients infected with*  
410 *avian influenza A H7N9*. PloS one, 2014. **9**(7): p. e101788.
- 411 18. Ansel, K.M., R.B. Harris, and J.G. Cyster, *CXCL13 is required for B1 cell homing, natural*  
412 *antibody production, and body cavity immunity*. Immunity, 2002. **16**(1): p. 67-76.
- 413 19. Ugucconi, M., et al., *Actions of the chemotactic cytokines MCP - 1, MCP - 2, MCP - 3,*

- 414 *RANTES, MIP - 1 $\alpha$  and MIP - 1 $\beta$  on human monocytes.* European journal of immunology,  
415 1995. **25**(1): p. 64-68.
- 416 20. Proost, P., A. Wuyts, and J. Damme, *Human monocyte chemotactic proteins - 2 and - 3:*  
417 *structural and functional comparison with MCP - 1.* Journal of leukocyte biology, 1996. **59**(1):  
418 p. 67-74.
- 419 21. Zhou, J., et al., *Biological features of novel avian influenza A (H7N9) virus.* Nature, 2013.  
420 **499**(7459): p. 500.
- 421 22. Liu, Q., Y.-h. Zhou, and Z.-q. Yang, *The cytokine storm of severe influenza and development of*  
422 *immunomodulatory therapy.* Cellular & molecular immunology, 2016. **13**(1): p. 3.
- 423 23. Zhao, C., et al., *Proinflammatory Cytokine Dysregulation is Associated with Novel Avian*  
424 *Influenza A (H7N9) Virus in Primary Human Macrophages.* Journal of General Virology, 2016.  
425 **97**(2): p. 299.
- 426 24. Payet, L.D., S.M. Firth, and R.C. Baxter, *The role of the acid-labile subunit in regulating*  
427 *insulin-like growth factor transport across human umbilical vein endothelial cell monolayers.*  
428 *The Journal of Clinical Endocrinology & Metabolism*, 2004. **89**(5): p. 2382-2389.
- 429 25. Baxter, R.C., *Insulin-like growth factor binding protein-3 (IGFBP-3): Novel ligands mediate*  
430 *unexpected functions.* Journal of cell communication and signaling, 2013. **7**(3): p. 179-189.
- 431 26. Banner, L.R., et al., *Leukemia inhibitory factor is an anti-inflammatory and analgesic cytokine.*  
432 *Journal of Neuroscience the Official Journal of the Society for Neuroscience*, 1998. **18**(14): p.  
433 5456.
- 434 27. Gadiant, R.A. and P.H. Patterson, *Leukemia inhibitory factor, Interleukin 6, and other cytokines*  
435 *using the GPI30 transducing receptor: roles in inflammation and injury.* Stem Cells, 1999.  
436 **17**(3): p. 127-137.
- 437 28. Rost, B., et al., *Monocytes of allergics and non-allergics produce, store and release the*  
438 *neurotrophins NGF, BDNF and NT-3.* Regulatory Peptides, 2005. **124**(1-3): p. 19-25.
- 439 29. Acy, L., et al., *Avian influenza virus A H7N9 infects multiple mononuclear cell types in*  
440 *peripheral blood and induces dysregulated cytokine responses and apoptosis in infected*  
441 *monocytes.* Journal of General Virology, 2017. **98**(5).
- 442 30. Lee, A.C., et al., *Suboptimal humoral immune response against influenza A(H7N9) virus is*  
443 *related to its internal genes.* Clinical & Vaccine Immunology Cvi, 2015. **22**(12): p. 1235.
- 444 31. Phu, P.S., et al., *Excess winter mortality in France: influence of temperature, influenza like*  
445 *illness, and residential care status.* Journal of the American Medical Directors Association,  
446 2012. **13**(3): p. 309.e1-309.e7.
- 447 32. Haran, J.P., S. Suner, and F. Gardiner, *Correlation of C-reactive protein to severity of symptoms*  
448 *in acute influenza A infection.* Journal of emergencies, trauma, and shock, 2012. **5**(2): p. 149.
- 449 33. Wang, Z.F., et al., *Serum D-dimer changes and prognostic implication in 2009 novel influenza*  
450 *A(H1N1).* Thrombosis Research, 2011. **127**(3): p. 198-201.
- 451 34. Ingram, P.R., et al., *Procalcitonin and C-reactive protein in severe 2009 H1N1 influenza*  
452 *infection.* Intensive Care Medicine, 2010. **36**(3): p. 528-532.
- 453 35. Guo, J., et al., *Corrigendum: The Serum Profile of Hypercytokinemia Factors Identified in*  
454 *H7N9-Infected Patients can Predict Fatal Outcomes.* Sci Rep, 2015. **5**: p. 10942.
- 455 36. Lu, S., et al., *Prognosis of 18 H7N9 avian influenza patients in Shanghai.* Plos One, 2014. **9**(4):  
456 p. e88728.
- 457 37. Shen, Z., et al., *Host immunological response and factors associated with clinical outcome in*

- 458 *patients with the novel influenza A H7N9 infection*. *Clinical Microbiology & Infection* the  
459 Official Publication of the European Society of Clinical Microbiology & Infectious Diseases,  
460 2014. **20**(8): p. 493-500.
- 461 38. commission, G.o.o.C.n.h.a.f.p. *Diagnosis and treatment of H7N9 avian influenza in humans*.  
462 2014 [cited 2014 24th, Jan.]; Available from:  
463 <http://www.nhfpc.gov.cn/yzygj/s3593g/201401/3f69fe196ecb4cfc8a2d6d96182f8b22.shtml>.
- 464 39. Peng, H., F. Long, and C. Ding, *Feature selection based on mutual information: criteria of max-*  
465 *dependency, max-relevance, and min-redundancy*. *IEEE Trans Pattern Anal Mach Intell*, 2005.  
466 **27**(8): p. 1226-38.

467

## 468 **Figure legends**

469

470 **Figure 1** Cytokine expressing change profile during H7N9 infection disease  
471 progression. (a) Heatmap of cytokine change fold compared with health individuals.  
472 The data was presented as fold of change compared with the mean value of five health  
473 controls. Each column represented one patient while each row showed one cytokine or  
474 chemokine detected in the study. (b) Different cytokine expression profiles among  
475 heathy (H), mild (M), severe (S) and fatal (D) groups. Cytokines sequentially from top  
476 to bottom were in accordance with that in Figure 1a. Cytokine expression baselines  
477 were indicated by bar chart on the left and the relative fold of change in cytokines or  
478 chemokines between different groups was calculated on the right panel. Paired t-test  
479 were performed among H, M, S and D. Cytokines or chemokines that up-regulated  
480 significantly were indicated in red while those dramatically down-regulated cytokines  
481 or chemokines were indicated in green. The seven cytokines or chemokines that showed  
482 positive correlation with viral load were highlighted by red solid square.

483

484 **Figure 2** Profiles of cytokine and chemokine response against H7N9 infection among

485 M, S and D patient groups. (a) Venn diagrams of up-regulated and (b) down-regulated  
486 cytokines or chemokines in M, S and D groups compared with that in healthy controls.  
487 (c) Up-regulated and (d) down-regulated cytokines or chemokines in D group compared  
488 with that in M and S group respectively. The exact names of cytokines or chemokines  
489 were listed below each venn diagram accordingly.

490

491 **Figure 3** Different Kinetics of dys-regulated cytokines or chemokines in fatal-outcome  
492 patients. (a) Dynamic kinetics of cytokines or chemokines upregulated or (b)  
493 downregulated significantly in fatal patients compared with both mild and severe  
494 patients.

495

496 **Figure 4** Correlation analysis of cytokine or chemokine levels with clinical  
497 manifestations of H7N9-infected patients. Spearman's rank correlation analysis was  
498 performed and 42 cytokines or chemokines showed correlations with at least one of the  
499 five clinical manifestations which were OI, CRP, PCT, T (body temperature) and viral  
500 load (shown as CT value). The correlation was evaluated based on correlation  
501 coefficient ( $r$ ) value as  $r=0.2-0.4$  for weak correlation,  $r=0.4-0.6$  for moderate  
502 correlation and  $r=0.6-0.8$  for strong correlation.

503

504 **Figure 5** Co-regulation networks of cytokines and chemokines in H7N9 infected  
505 patients and healthy controls. Cytokines or chemokines were shown in different colours  
506 according to their properties. The links indicated strong correlations between each two

507 cytokines/chemokines ( $r > 0.8$ ) according to spearman's rank correlation analysis.

508

509 **Figure 6** Establishment of prediction models. The formulas were inducted by  
510 minimum redundancy maximum relevance (mRMR) algorithm and the induction  
511 incorporated only the firstly sampling data of cytokine/chemokine levels in H7N9  
512 infected patients. (a) Lowest error rate for factor selection for distinguishing Mild and  
513 Severe (MS) vs fatal (D). (b) Index values for distinguish Mild and Severe (MS) vs  
514 fatal (D) of each sample. (c) Lowest error rate for factor selection for distinguishing  
515 Mild (M) vs Severe and fatal (SD). (d) Index values for distinguish Mild (M) vs Severe  
516 and fatal (SD).

517

518 **Figure 7** Validation and proof of prediction models. (a) Training dataset (1<sup>st</sup> sample) (b)  
519 Validation with all samples of healthy and mild symptom. (c) Validation with all  
520 samples of fatal outcome. (d) Validation with all samples of severe symptom.

# Figure 1

a)

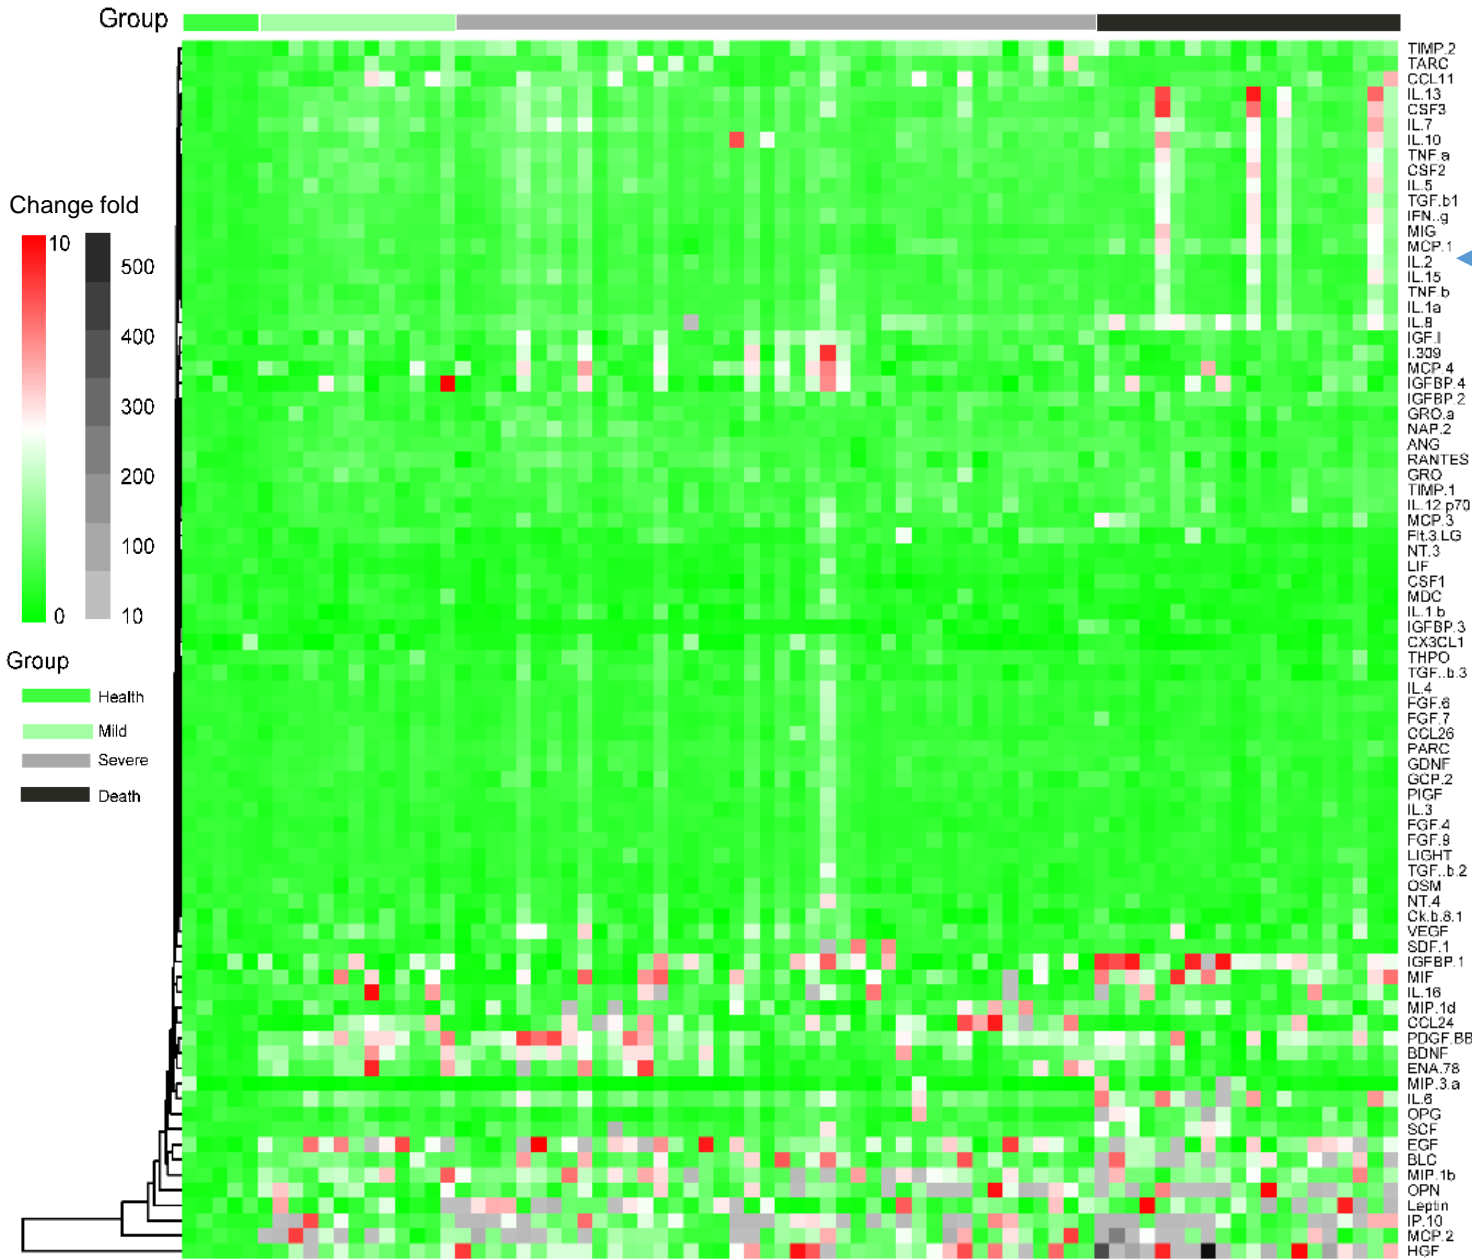

b)

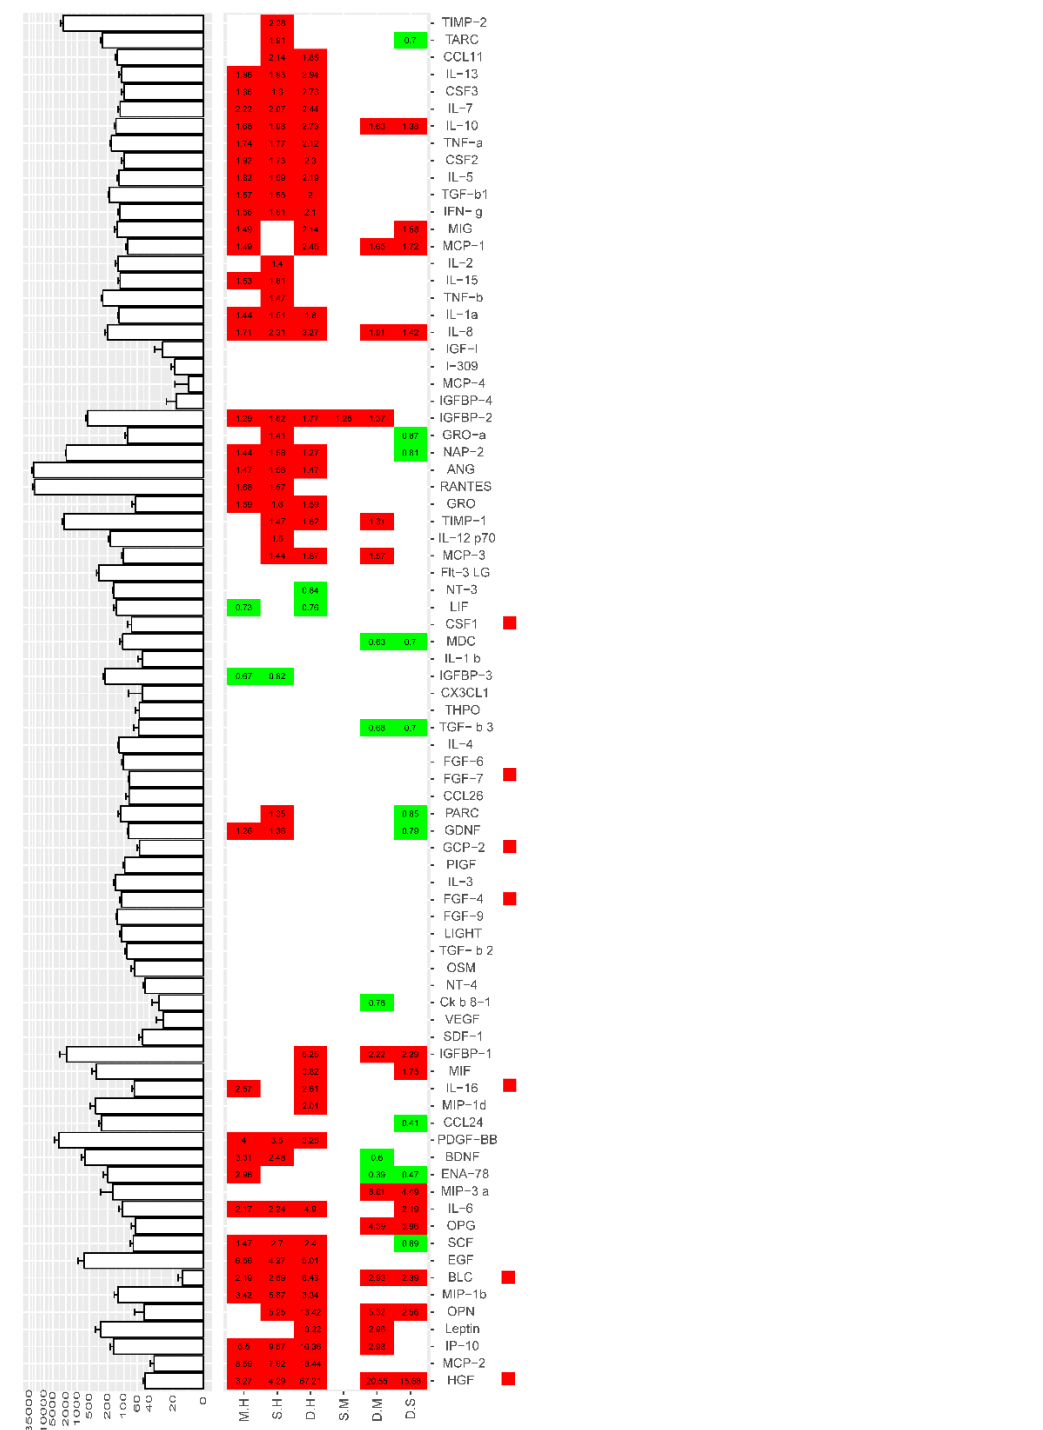



**Figure 2**

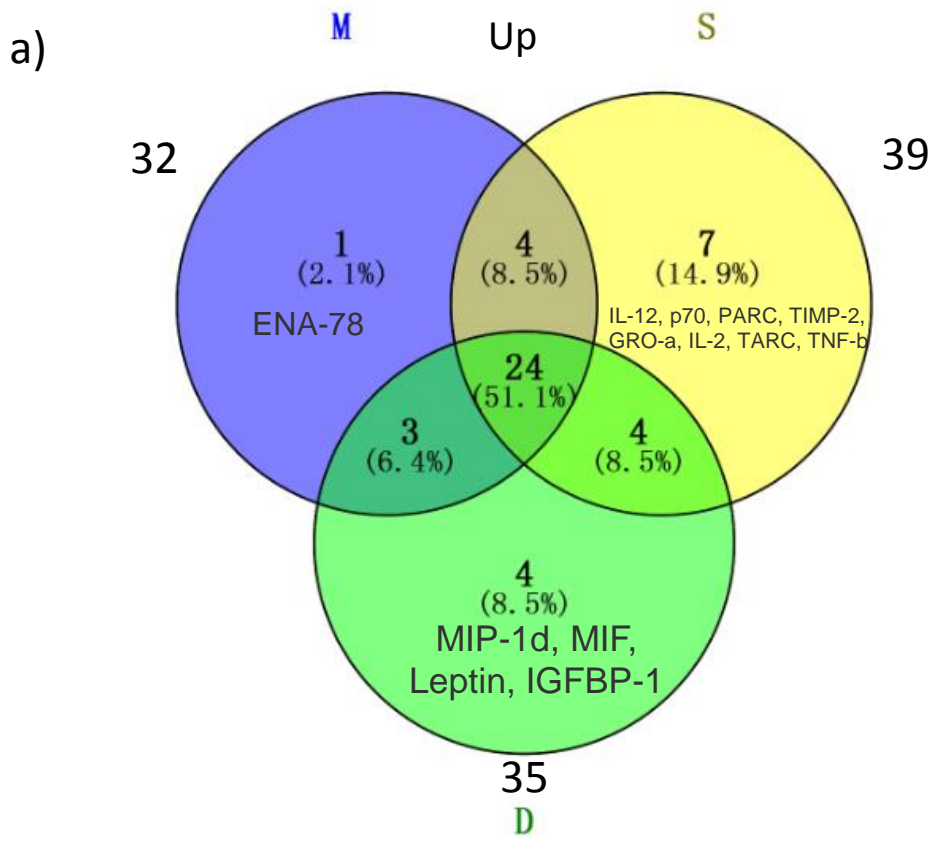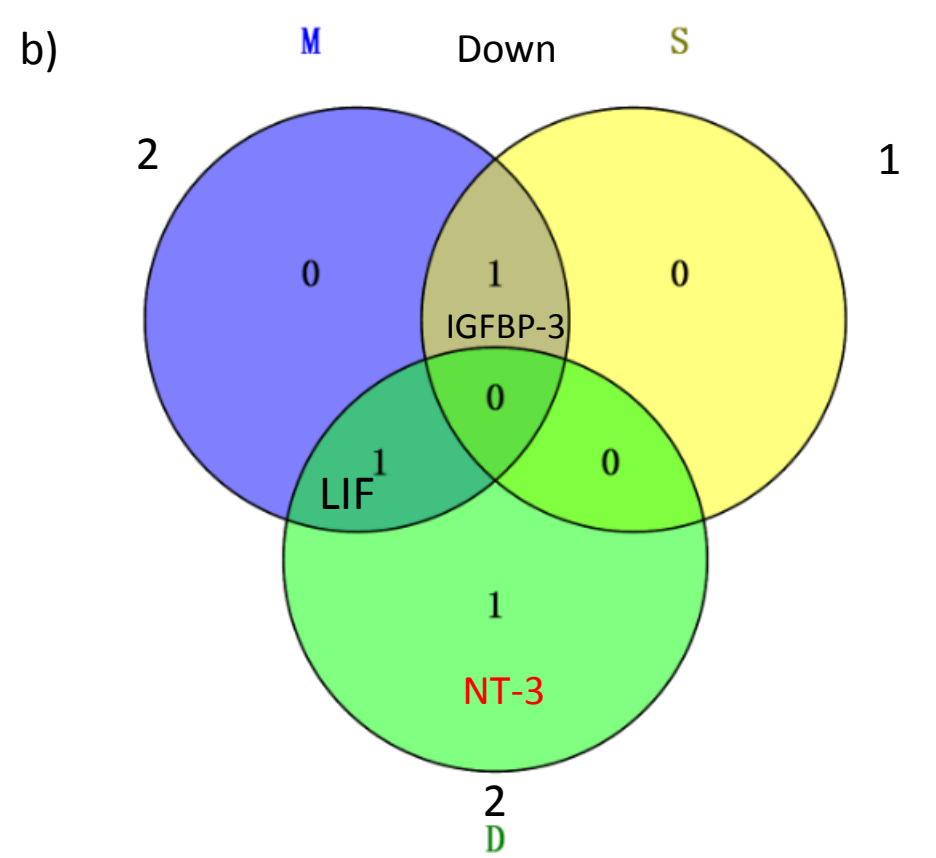

| Groups | Numbers | Cytokines                                                                                                                                    |
|--------|---------|----------------------------------------------------------------------------------------------------------------------------------------------|
| D&M&S  | 24      | IL-13 IL-1a IL-8 IL-10 IL-7 IL-6; IFN- $\gamma$ ; CSF2 CSF3; BLC MIP-1b MCP-2 IP-10 NAP-2 GRO; EGF TGF-b1 PDGF-BB IGFBP-2 SCF HGF ANG; TNF-a |
| M&S    | 4       | BDNF GDNF RANTES IL-15                                                                                                                       |
| D&M    | 3       | MIG IL-16 MCP-1                                                                                                                              |
| D&S    | 4       | MCP-3 CCL11 OPN TIMP-1                                                                                                                       |
| M      | 1       | ENA-78                                                                                                                                       |
| S      | 7       | IL-12 p70 PARC TIMP-2 GRO-a IL-2 TARC TNF-b                                                                                                  |
| D      | 4       | MIP-1d MIF Leptin IGFBP-1                                                                                                                    |

| Groups | Numbers | Beneficial Cytokines      |
|--------|---------|---------------------------|
| D&M&S  | 24      | PDGF-BB, NAP-2            |
| M&S    | 4       | BDNF GDNF RANTES          |
| D&M    | 3       | MIG IL-16 MCP-1           |
| D&S    | 4       | CCL11                     |
| M      | 1       | ENA-78                    |
| S      | 7       | PARC, TIMP-2, TNF-b, TARC |
| D      | 4       |                           |

**Figure 2**

c)

Up

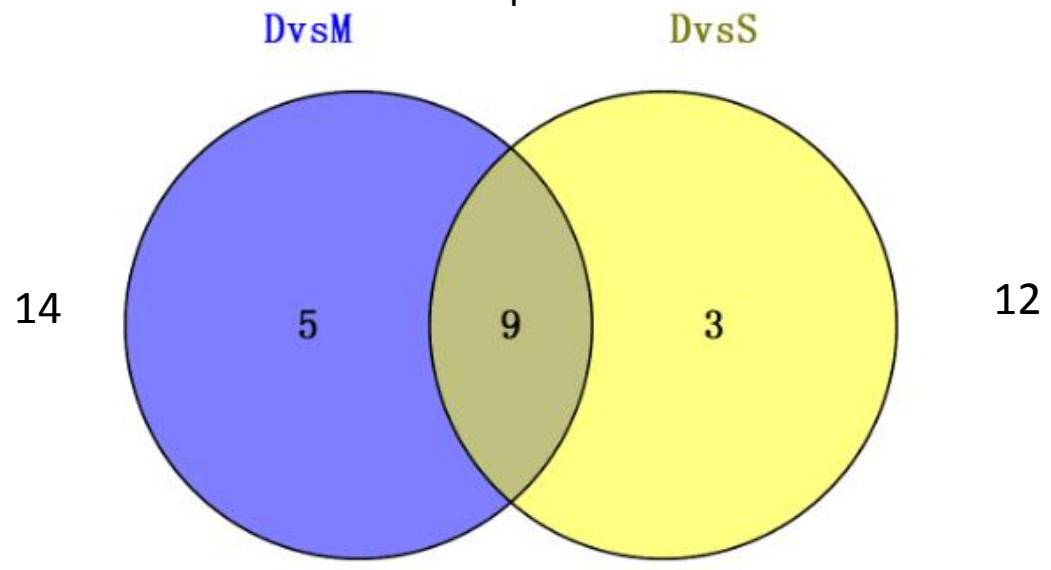

d)

Down

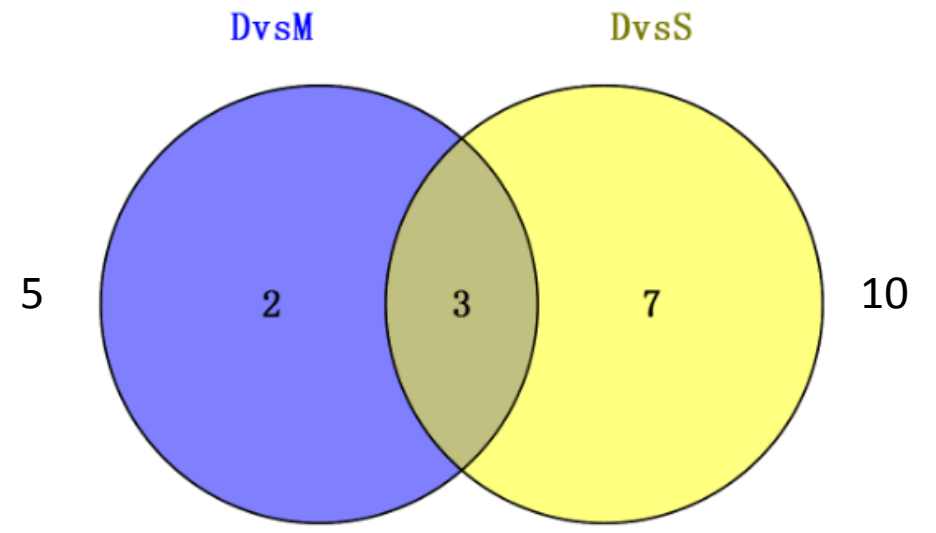

| Groups    | Numbers | Cytokines                                          |
|-----------|---------|----------------------------------------------------|
| D>M & D>S | 9       | IL-8 IL-10; BLC MIP-3a MCP-1; HGF IGFBP-1; OPG OPN |
| D>M       | 5       | IGFBP-2 Leptin IP-10 TIMP-1 MCP-3                  |
| D>S       | 3       | MIG <i>MIF</i> IL-6                                |

| Names     | total | Cytokines                                   |
|-----------|-------|---------------------------------------------|
| D<M & D<S | 3     | MDC ENA-78; TGF- b3                         |
| D<M       | 2     | Ck b 8-1 BDNF                               |
| D<S       | 7     | CCL24 GRO-a TARC SCF <i>GDNF</i> NAP-2 PARC |

Figure 3

a)

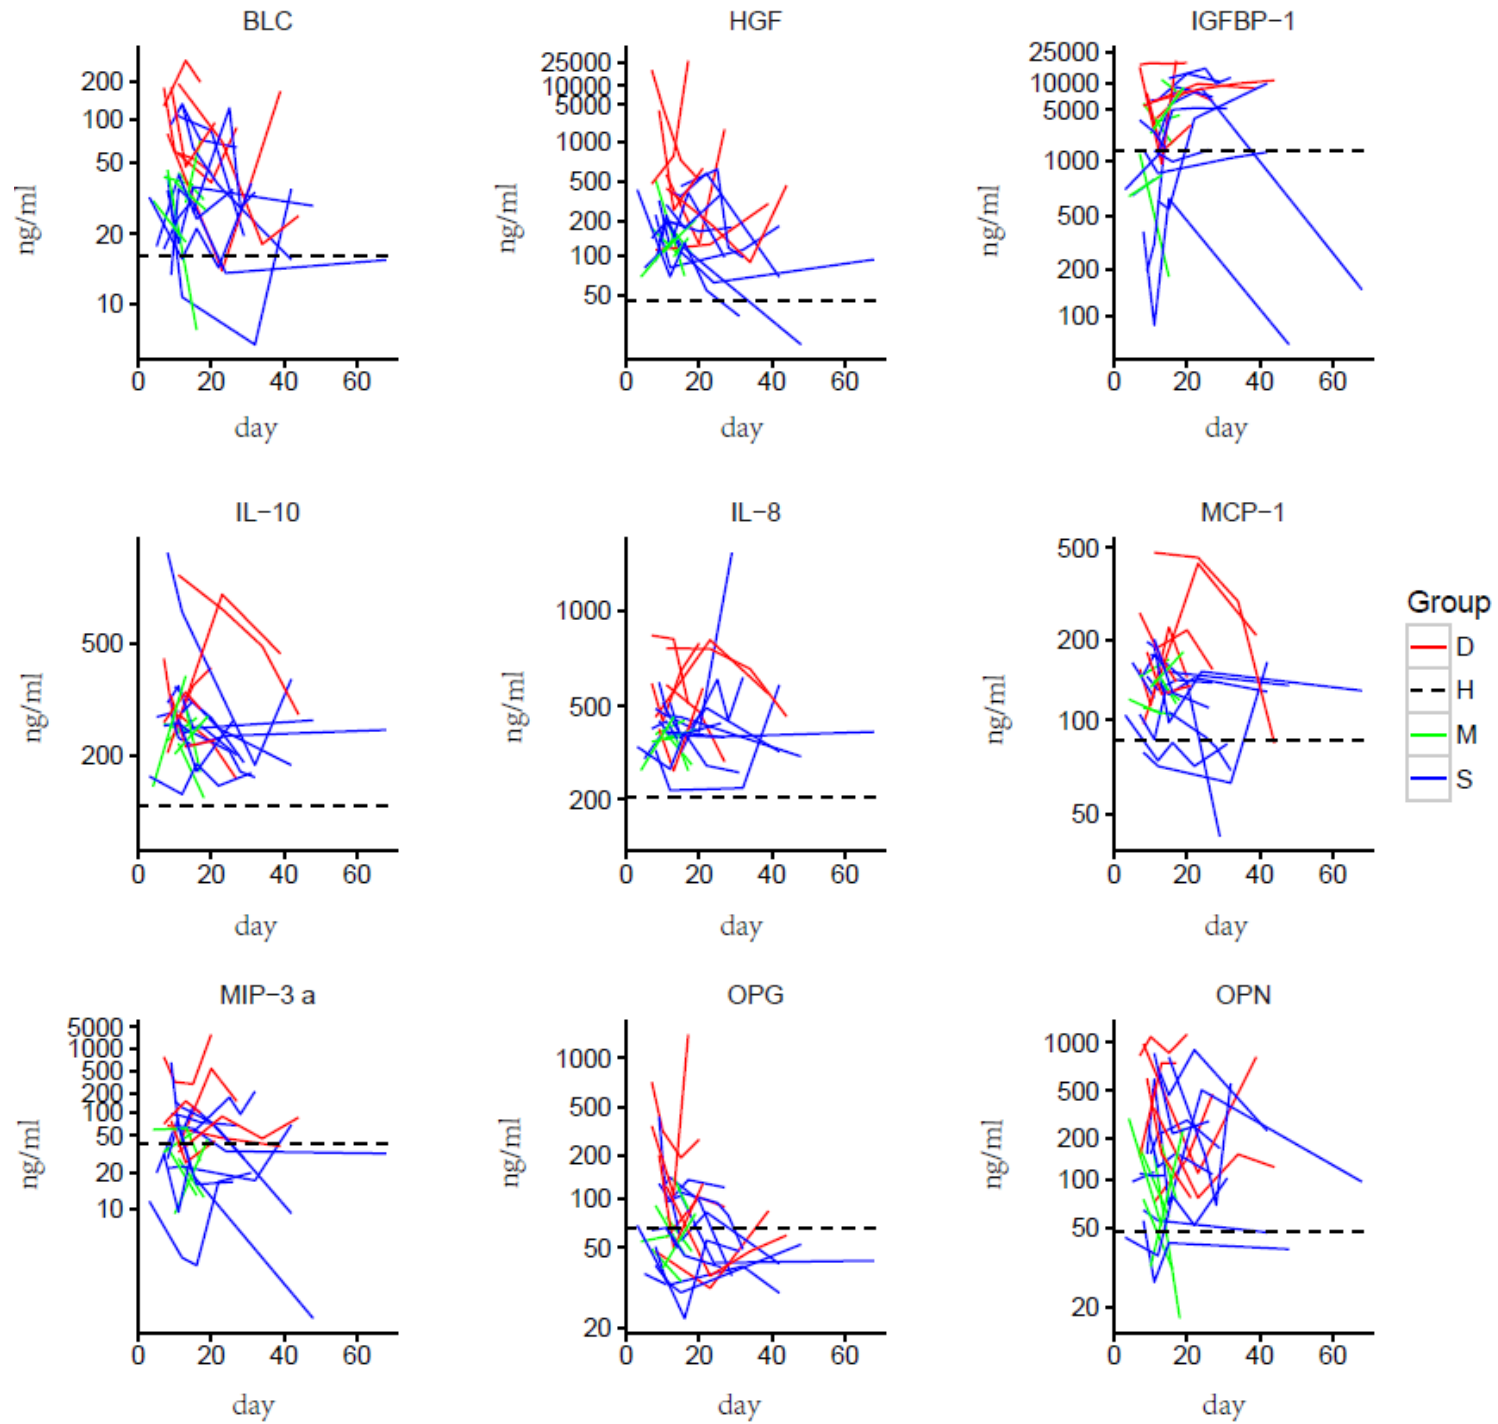

Figure 3

b)

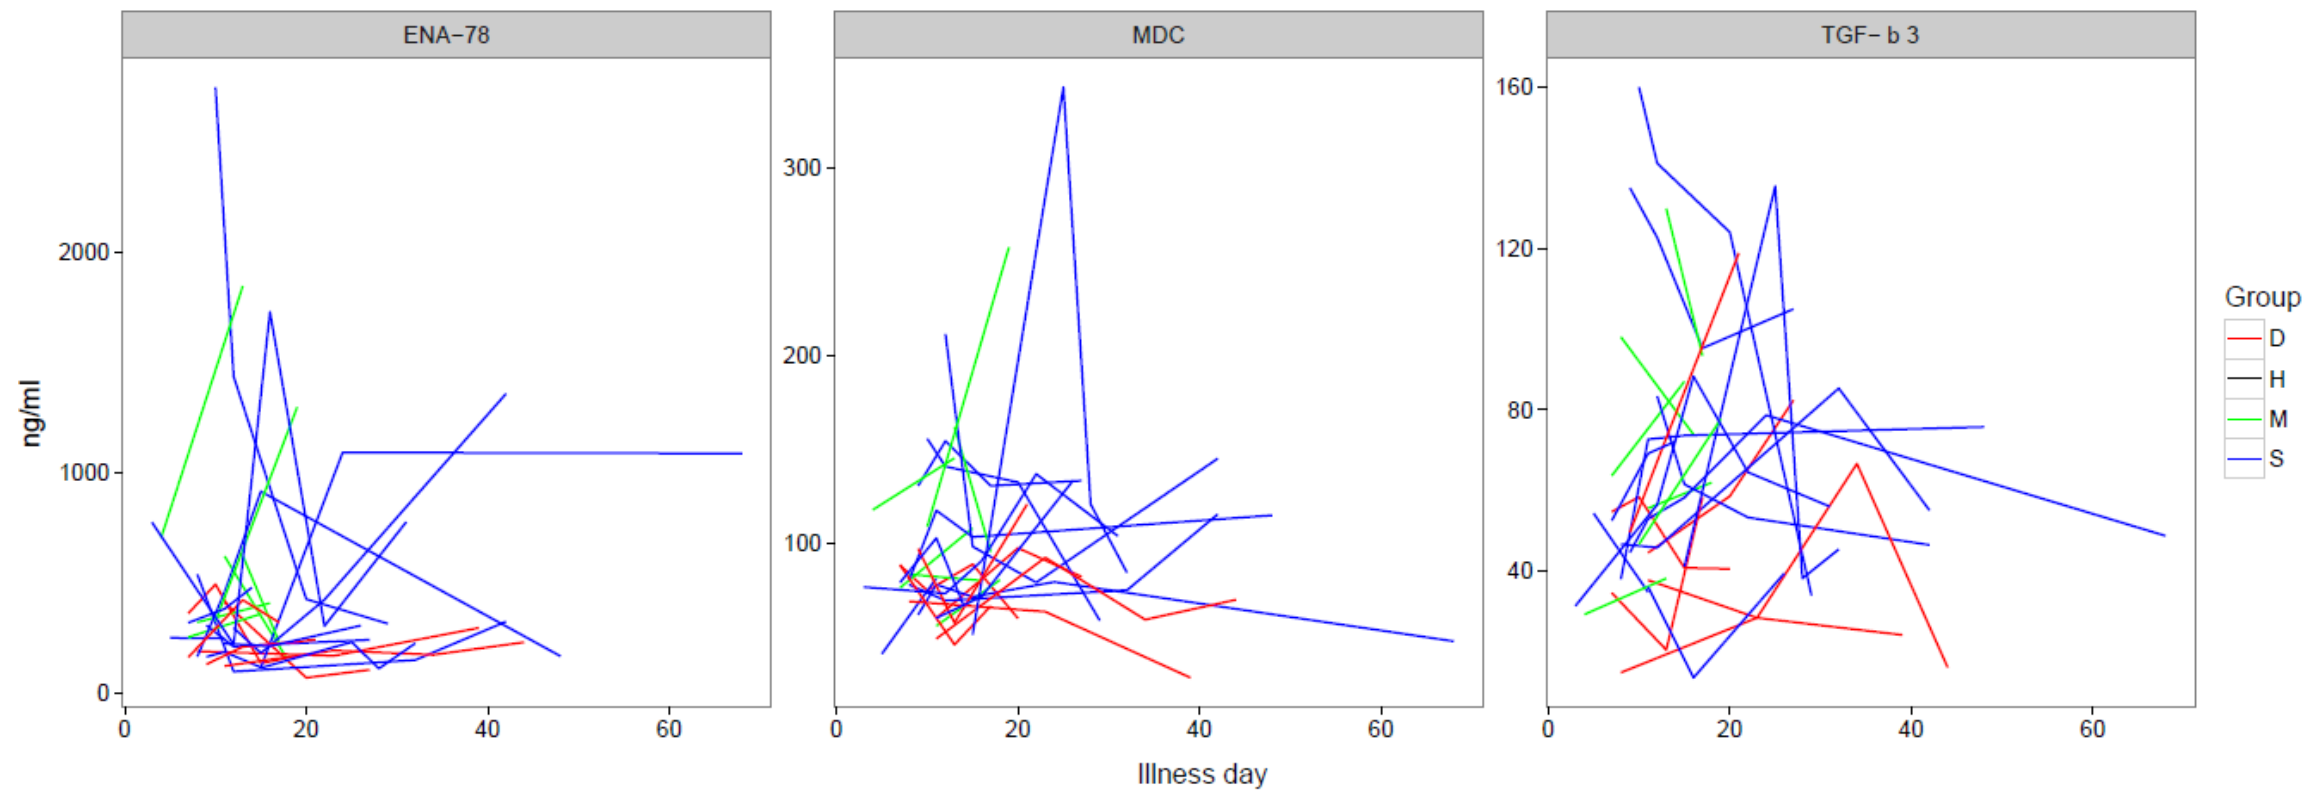

Figure 4

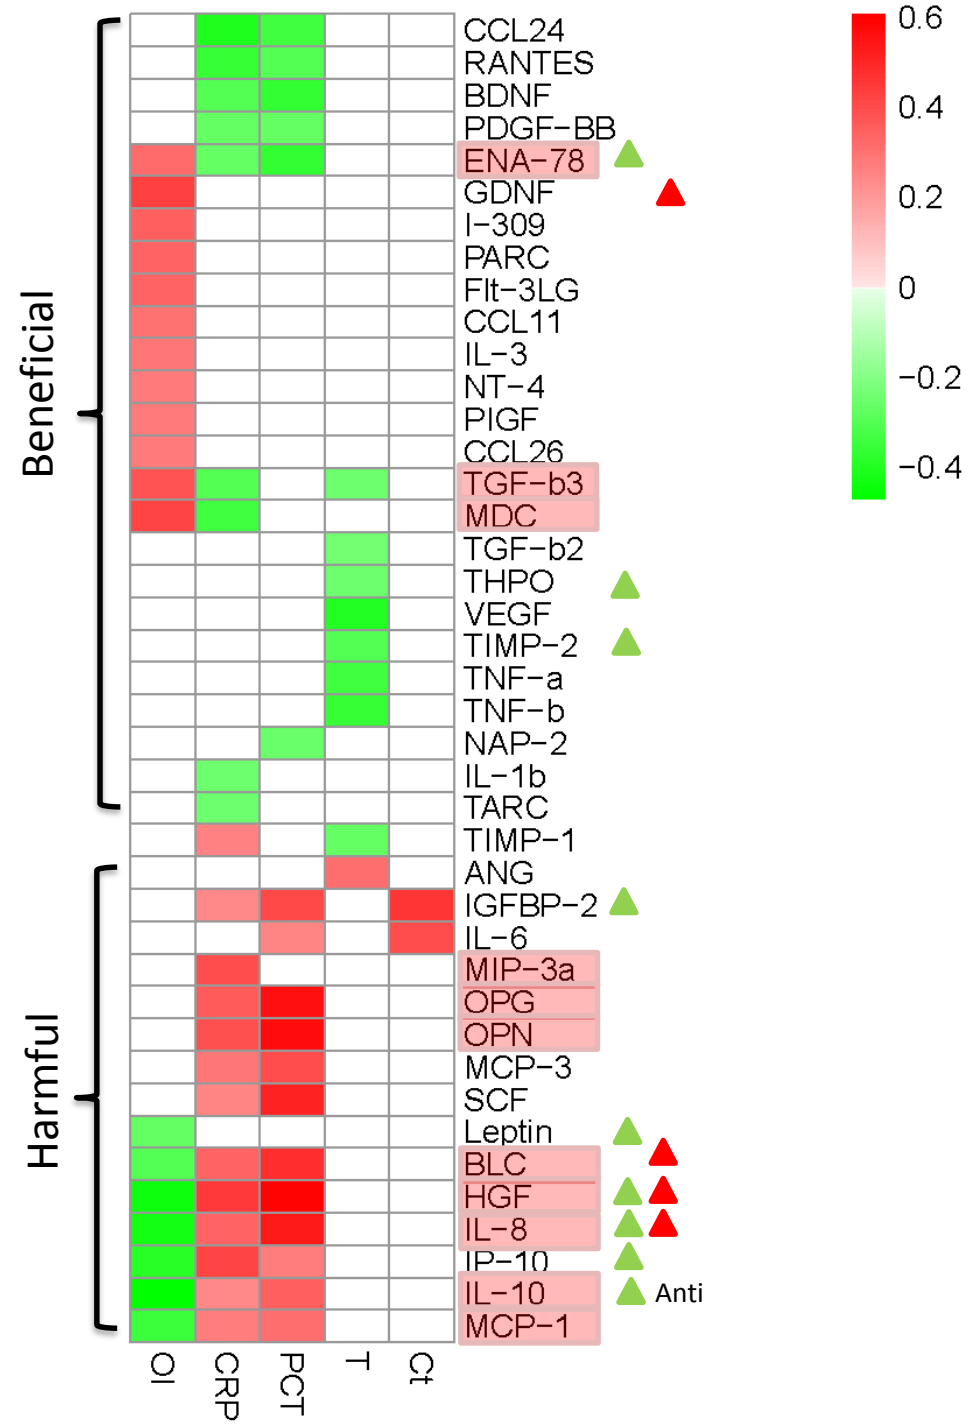

Figure 5

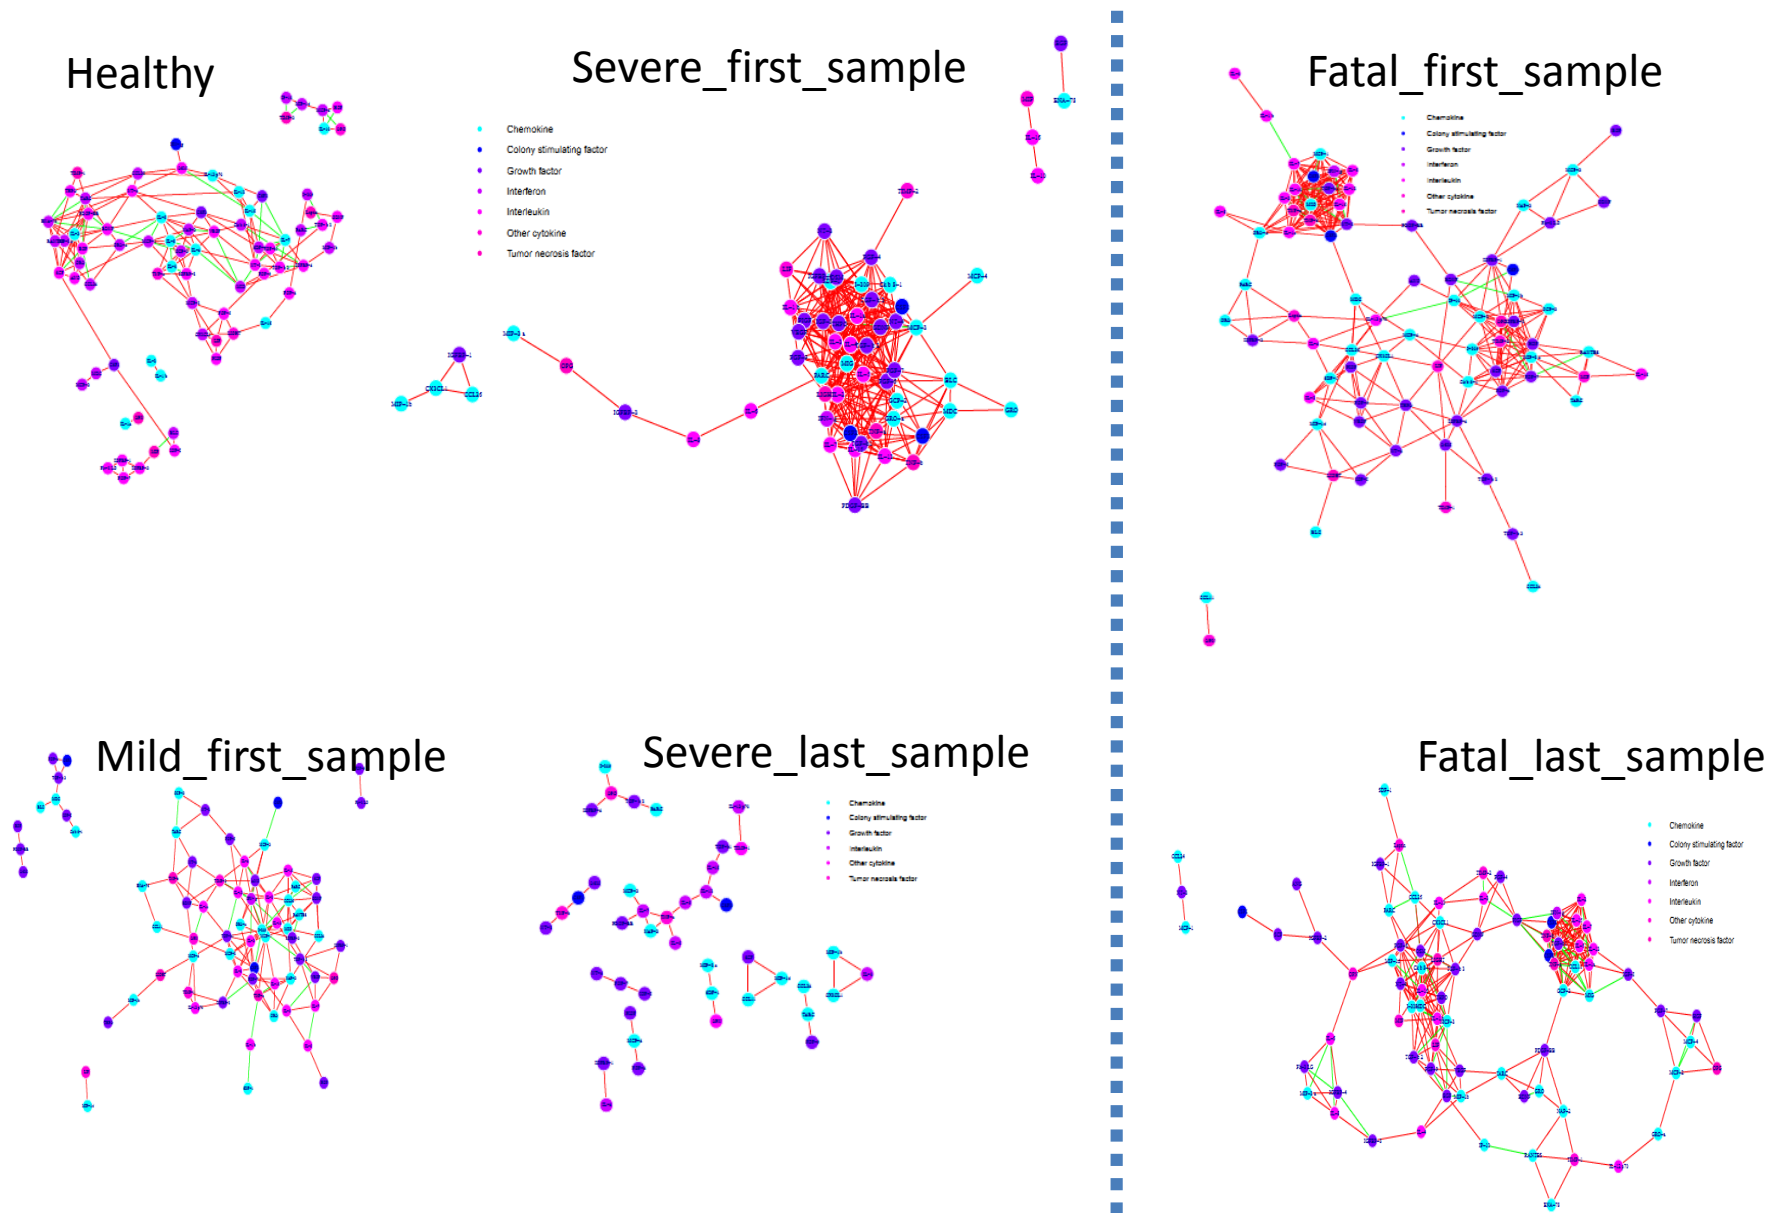

Figure 6

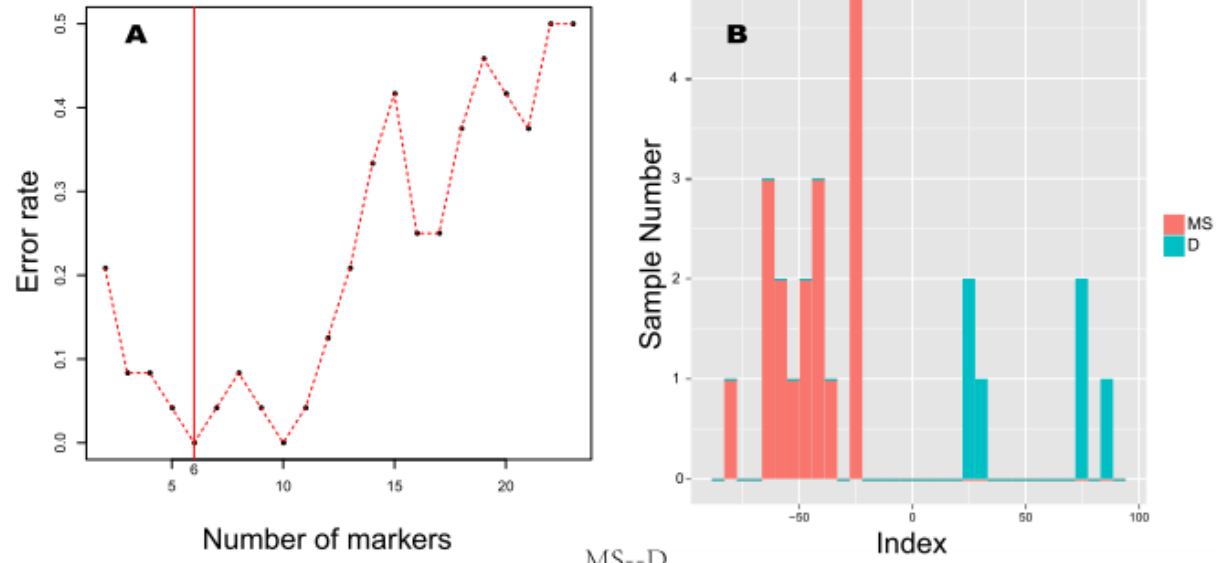

MS--D

M--SD

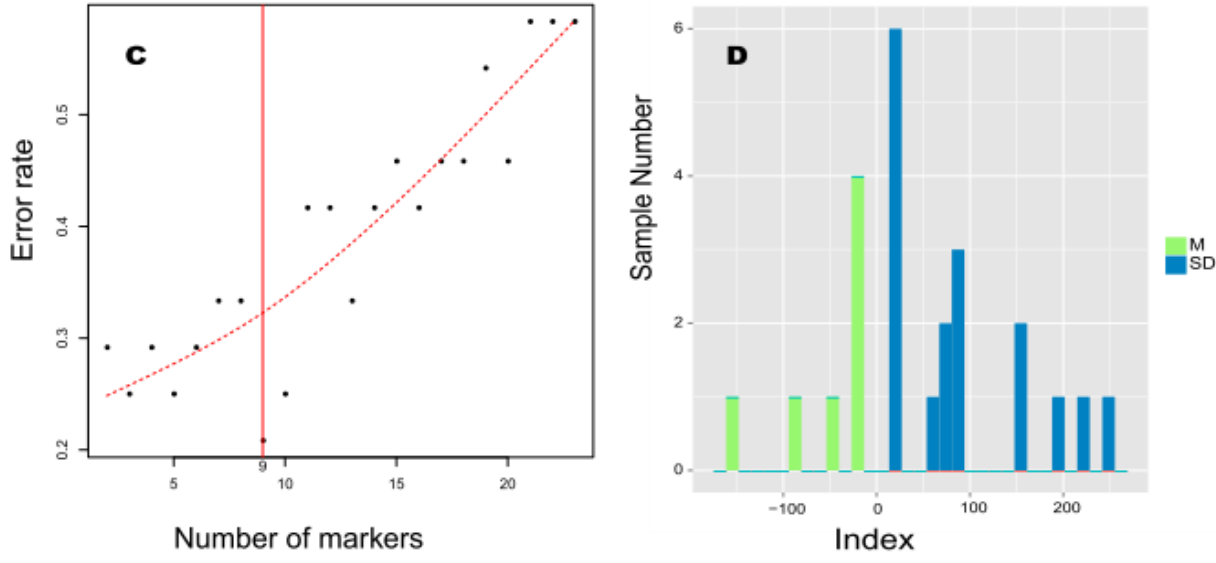

**Figure 7**

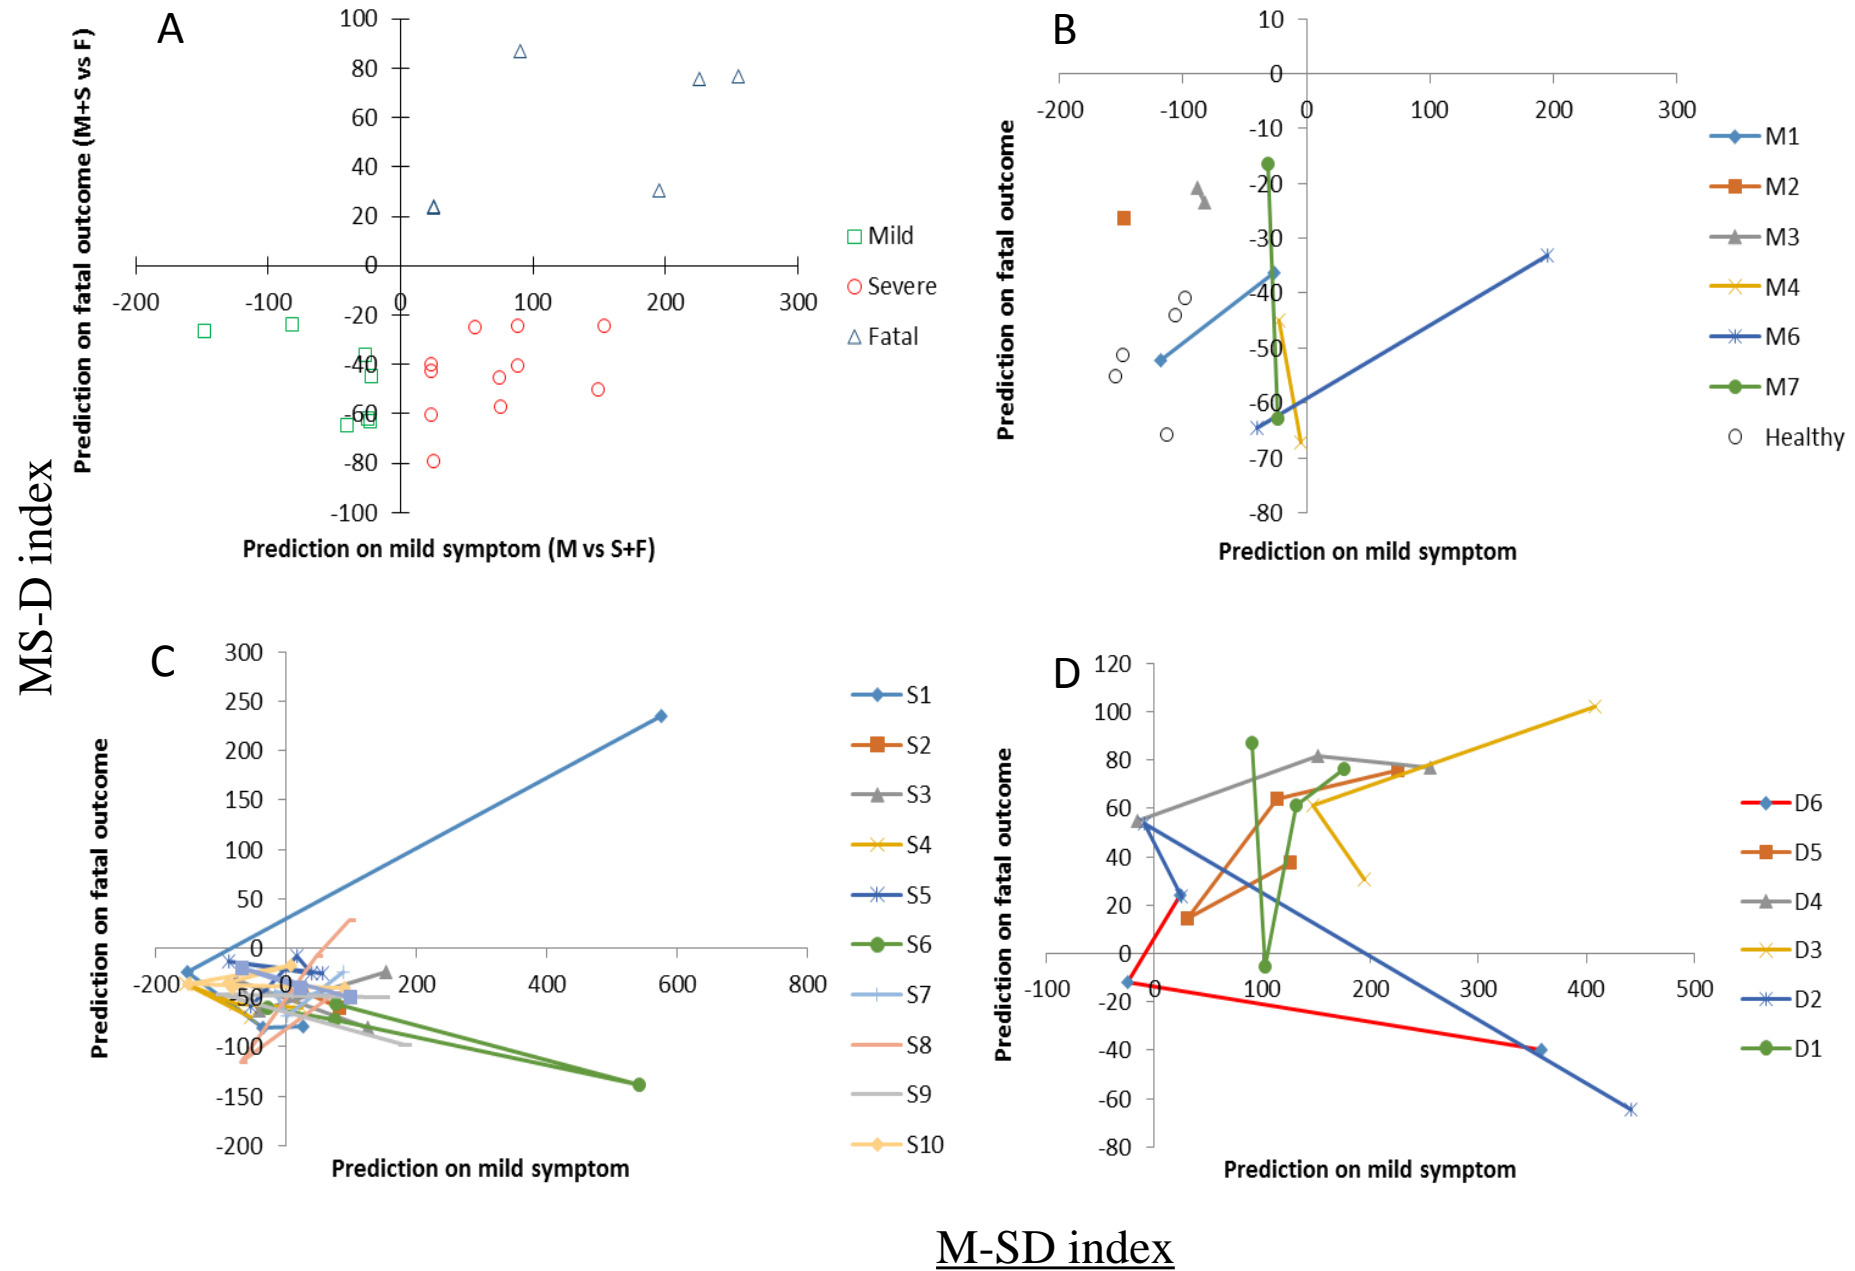

Source: https://www.biorxiv.org/content/10.1101/339333v1.full.pdf
